# Supplementary material
Source: publisher figshare collection journal article supplement (https://frontiersin.figshare.com/ndownloader/files/17809430)
Supplement: Supplementary file [file 17809430]

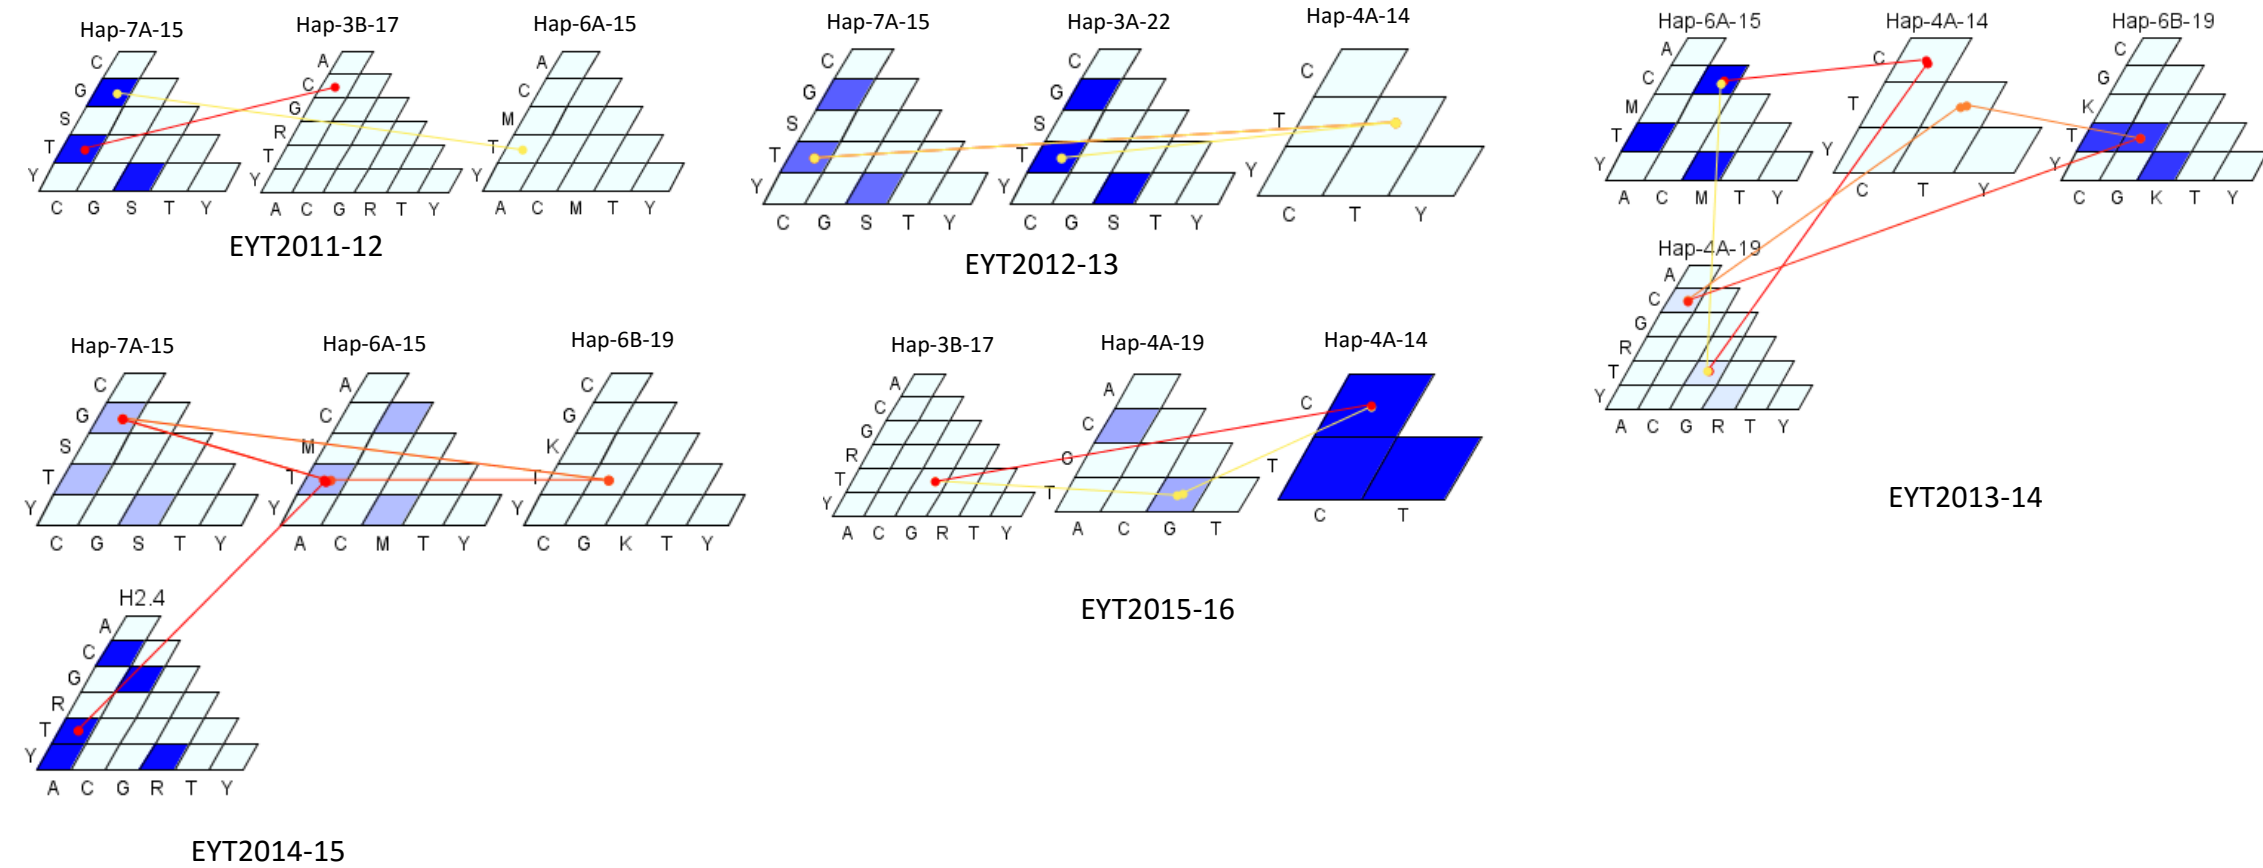

Fig. S4 Epistatic interactions among major and minor effect loci for TGW. The magnitude of marker effect (F value) is represented with shades of blue (dark blue with stronger interaction). The magnitude of epistatic interaction is presented with colors from yellow to red (stronger interaction)
